# Supplementary material for: Contemporary ultrasound, computed tomography, or magnetic resonance imaging for acute appendicitis diagnosis in children and adolescents: systematic review and meta-analysis.
Source: Research Square preprint supplement (doi:10.21203/rs.3.rs-6100084/v1), 2025-03-04
Supplement: Supplementary file 1 [file 937fd4e9cf1f00391c29b2d4.docx]

**Supplementary information 1**

**Search strategies used for each database**

| **Database** | **Estrategy** | **Results** |
| --- | --- | --- |
| **PUBMED** | ((((Appendicitis[MeSH Terms]) OR (Appendicitis[Title/Abstract])) AND ((Diagnosis[MeSH Terms]) OR (Diagnosis[Title/Abstract]))) AND ((Ultrasonography[MeSH Terms]) OR (Ultrasonography[Title/Abstract]) OR (Tomography, X-Ray Computed[MeSH Terms]) OR (Tomography, X-Ray Computed[Title/Abstract]) OR (Magnetic Resonance Spectroscopy[MeSH Terms]) OR (Magnetic Resonance Spectroscopy[Title/Abstract]))) | 1780 |
| **BVS** | (“Apendicitis” OR “Apendicitis aguda”) AND (“Diagnóstico”) AND (“Ultrasonografía” OR “Diagnóstico por Ultrasonido” OR “Ecografía” OR “Ecografía Médica” OR “Ecotomografía” OR “Ecotomografía por Computador” OR “Imagen de Ultrasonido” Or “Imagen por Ultrasonido” OR “Imagen Ultrasónica” OR “Imagen Ultrasonográfica” OR “Sonografía Médica” OR “Tomografía Ultrasonica” OR “Tomografía Computarizada por Rayos X” OR “Cine-CT” OR “Cine-TC” OR “TAC por Rayos X” OR “TC por Rayos X” OR “Tomodensitometría” OR “Tomografía Computada por Rayos X” OR “Tomografía Computarizada” OR “Tomografía Computarizada por Haz Electrónico” OR “Tomografía Computarizada por Transmisión de Rayos X” OR “Tomografía por Haz Electrónnico” OR “Tomografía por Transmisión Computarizada” OR “Espectroscopía de Resonancia Magnética” OR “Espectroscopía MR” OR “Espectroscopía por Resonancia Magnética Nuclear” OR “Espectroscopía RMN” OR “Espectroscopía RMN In Vivo” OR “NMR” OR  “Resonancia Magnética” OR “Resonancia Magnética Nuclear”) 1442  (“Apendicitis” OR “Apendicitis aguda”) AND (“Diagnóstico”) AND (“Ultrasonografía” OR “Diagnóstico por Ultrasonido” OR “Ecografía” OR “Ecografía Médica” OR “Ecotomografía” OR “Ecotomografía por Computador” OR “Imagen de Ultrasonido” Or “Imagen por Ultrasonido” OR “Imagen Ultrasónica” OR “Imagen Ultrasonográfica” OR “Sonografía Médica” OR “Tomografía Ultrasonica” OR “Tomografía Computarizada por Rayos X” OR “Cine-CT” OR “Cine-TC” OR “TAC por Rayos X” OR “TC por Rayos X” OR “Tomodensitometría” OR “Tomografía Computada por Rayos X” OR “Tomografía Computarizada” OR “Tomografía Computarizada por Haz Electrónico” OR “Tomografía Computarizada por Transmisión de Rayos X” OR “Tomografía por Haz Electrónnico” OR “Tomografía por Transmisión Computarizada” OR “Espectroscopía de Resonancia Magnética” OR “Espectroscopía MR” OR “Espectroscopía por Resonancia Magnética Nuclear” OR “Espectroscopía RMN” OR “Espectroscopía RMN In Vivo” OR “NMR” OR  “Resonancia Magnética” OR “Resonancia Magnética Nuclear”) AND ("Niño") 225 | **225** |
| **OVID** | 1 Appendicitis/ 21592  2 Appendicitis.mp. [mp=ti, ab, tx, ct, sh, bt, ot, nm, hw, fx, kf, ox, px, rx, an, ui, sy, ux, mx] 52547  3 1 or 2 52547  4 Diagnosis/ 17549  5 Diagnos$.mp. [mp=ti, ab, tx, ct, sh, bt, ot, nm, hw, fx, kf, ox, px, rx, an, ui, sy, ux, mx] 9903926  6 4 or 5 9903926  7 Ultrasonography/ 203814  8 Ultrasono$.mp. [mp=ti, ab, tx, ct, sh, bt, ot, nm, hw, fx, kf, ox, px, rx, an, ui, sy, ux, mx] 605318  9 Ultrasoun$.mp. [mp=ti, ab, tx, ct, sh, bt, ot, nm, hw, fx, kf, ox, px, rx, an, ui, sy, ux, mx] 884829  10 Tomography, X-Ray Computed/ 425005  11 Tomograph$.mp. [mp=ti, ab, tx, ct, sh, bt, ot, nm, hw, fx, kf, ox, px, rx, an, ui, sy, ux, mx] 1630353  12 Tomography, X-Ray Computed.mp. [mp=ti, ab, tx, ct, sh, bt, ot, nm, hw, fx, kf, ox, px, rx, an, ui, sy, ux, mx] 426734  13 Magnetic Resonance Spectroscopy/ 160325  14 Magnetic Resonance Spectroscopy.mp. [mp=ti, ab, tx, ct, sh, bt, ot, nm, hw, fx, kf, ox, px, rx, an, ui, sy, ux, mx] 203751  15 Magnetic Reson$.mp. [mp=ti, ab, tx, ct, sh, bt, ot, nm, hw, fx, kf, ox, px, rx, an, ui, sy, ux, mx] 1468044  16 7 or 8 or 9 or 10 or 11 or 12 or 13 or 14 or 15 3576538  17 child/ or infant/ 2348208  18 3 and 6 and 16 and 17 1497  19 remove duplicates from 18 1495 | **1495** |
| **Web of Science** | 1: (ALL=(Appendicitis)) OR ALL=(Appendic*)  2: (ALL=(Diagnosis)) OR ALL=(Diagnos*)  3: (((((ALL=(Ultrasonography )) OR ALL=(Ultrasonograph*)) OR ALL=(Tomography, X-Ray Computed)) OR ALL=(Tomography, X-Ray Computed)) OR ALL=(Magnetic Resonance Spectroscopy)) OR ALL=(Magnetic Resonance)  4: ((((ALL=(child*)) OR ALL=(pediatric*)) OR ALL=(infant*)) OR ALL=(adolesc*)) OR ALL=(young adul*)  5: #4 AND #3 AND #2 AND #1 | **746** |
| **Trip Database** | (((magnetic resonan*) OR (magnetic resonance spectroscopy) OR (tomography, x-ray computed) OR (tomograph*) OR (ultraso*) OR (ultrasoun*) OR (ultrasonography)) AND ((diagnosi*) OR (diagnostic)) AND (("appendic*") OR ("appendicitis"))) | **387** |
